# Supplementary material for: Experimental study on the impact of Speed-Agility-Quickness Training method on the agility performance of collegiate sanda specialty students
Source: PeerJ journal article supplement (doi:10.7717/peerj.19406), 2025-05-14
Supplement: Original_questionnaire.docx [file Original_questionnaire.docx]

高校散打专选生灵敏素质测试指标咨询问卷

（第一轮）

教授专家您好！

非常感谢您能够填写此份调查问卷！我是河南师范大学体育学院的司幸伟老师，目前正在准备题为《SAQ训练法对高校散打专选生灵敏素质影响的实验研究》的研究。第一轮问卷调查的目的是科学有效地选择8个灵敏素质测试指标。本问卷中设计的问题仅参考本文，无对错之分。您的意见将是我撰写论文的重要依据，请如实填写。谢谢您！

填表说明

1. 本次专家调查问卷设计采用Likert5等级评分法，请您为下列各表的每个指标的重要性进行打分评价。按其重要程度，我们将其分为五个等级：非常不重要、不太重要、一般重要、比较重要、非常重要，分别赋值5、4、3、2、1。请您在合适的指标项的“重要程度（1-5）”一栏填写数字。
2. 指标修改意见

若您对表内所列指标有任何建议（修改/增加/删除），请在“是否修改一栏标注，并在“修改建议”一栏说明具体建议修改内容。

**第一部分**

一、您的职称是？

A.教授

B.副教授

C.讲师

D.教练

二、您的工作单位？

三、您的专业（研究方向）？

**第二部分**

**第一轮专家评选测试指标表**

| 测试指标 | **评分等级（1-5）** | **是否修改** | **修改建议** |
| --- | --- | --- | --- |
| T 形灵敏跑测试 |  |  |  |
| Pro 灵敏素质测试跑 |  |  |  |
| 三角背反应测试 |  |  |  |
| Illinois测试跑 |  |  |  |
| 六角球测试 |  |  |  |
| 罗盘指针测试 |  |  |  |
| 六点位测试跑 |  |  |  |
| 擂台折返跑 |  |  |  |
| 十字象限跳灵敏素质测试 |  |  |  |
| AFL 灵敏测试 |  |  |  |
| 15s 反复擂台跳擂台 |  |  |  |
| 拳腿组合衔接测试 |  |  |  |

附录2

SAQ训练法对高校散打专选生灵敏素质测试指标咨询问卷

（第二轮）

教授专家您好！

非常感谢您在第一轮咨询问卷中提出的宝贵意见，根据专家提出的修改意见，对本次第二轮问卷做出调整，本次将开展第二轮咨询问卷的目的是为了科学、有效选取六个高校散打专选生灵敏素质测试指标，本问卷设计的问题仅参考于本论文，并无对错之分。您的意见将是我进行论文撰写的重要依据，请如实填写。

**第一部分**

一、您的职称是？

A.教授

B.副教授

C.讲师

D.教练

二、您的工作单位？

三、您的专业（研究方向）？

**第二部分**

**第二轮专家评选测试指标表**

| 测试指标 | **评分等级（1-5）** | **是否修改** | **修改建议** |
| --- | --- | --- | --- |
| Pro 灵敏素质测试跑 |  |  |  |
| Illinois测试跑 |  |  |  |
| 罗盘指针测试 |  |  |  |
| 十字象限跳灵敏素质测试 |  |  |  |
| 六点位测试跑 |  |  |  |
| 15s 反复擂台跳擂台 |  |  |  |
| T 形灵敏跑测试 |  |  |  |
| 拳腿组合衔接测试 |  |  |  |
