# Supplementary material for: Experimental study on the impact of Speed-Agility-Quickness Training method on the agility performance of collegiate sanda specialty students
Source: PeerJ journal article supplement (doi:10.7717/peerj.19406), 2025-05-14
Supplement: Questionnaire.docx [file Questionnaire.docx]

**College Sanda Selected Students Sensitive Quality Test Index Consultation Questionnaire( 1st round )**

Professor experts Hello !

Thank you for filling in this questionnaire ! I am Si Xingwei teacher of Henan Normal University Institute of Physical Education, I am currently preparing for the research paper “Experimental Study on the Impact of SAQ Training Method on the Agility Quality of Collegiate Sanda Specialty Students”.The purpose of this first round of questionnaire is to scientifically and effectively select the sensitive quality test indicators of eight college Sanda students. The questions designed in this questionnaire only refer to this paper, and there is no right or wrong. Your comments will be an important basis for my thesis writing, please fill in truthfully.Thank you !

**formfilling explanation**

1.This expert questionnaire design uses Likert5 rating method, please rate and evaluate the importance of each index in the following tables. According to its importance, we divide it into five levels : very unimportant, less important, generally important, more important, very important, assigned 5, 4, 3, 2, 1 respectively. Please fill in the number in the column “Importance ( 1-5 )” of the appropriate indicator.

2.2.If you have any suggestions ( changes / additions / deletions ) on the indicators listed in the table, please indicate in the “whether to modify”column and specify the proposed changes in the“suggestions for modification” column.

**First part**

1.What is your title ?

A. Professor

B. Associate Professor

C. Lecturer

D. Coach

2.Your work unit ?

3.Your major ( research direction ) ?

**Second part**

| **Test indicators** | **Rating assignment（1-5）** | **whether to modify** | **suggestions for modification** |
| --- | --- | --- | --- |
| General agility |  |  |  |
| Special agility |  |  |  |

**Table1-1The first round of first-level sensitive quality test index screening**

**Table1-2The first round of second-level sensitive quality test index screening**

| **Test indicators** | **Rating assignment（1-5）** | **whether to modify** | **suggestions for modification** |
| --- | --- | --- | --- |
| T-shaped agility test |  |  |  |
| Pro agility test |  |  |  |
| Triangle back reaction test |  |  |  |
| Illinois test run |  |  |  |
| Hexagonal ball test |  |  |  |
| Compass pointer test |  |  |  |
| Six point test run |  |  |  |
| Challenge arena turnaround run |  |  |  |
| Cross quadrant jump test |  |  |  |
| AFL sensitivity test |  |  |  |
| 15s repeated challenge arena jump |  |  |  |
| Fist leg combination cohesion test |  |  |  |

| **Test indicators** | **Rating assignment（1-5）** | **whether to modify** | **suggestions for modification** |
| --- | --- | --- | --- |
| Ability to change direction |  |  |  |
| Change action ability |  |  |  |
| Complete technical capability |  |  |  |

**Table1-3 The first round of three-level sensitive quality test index screening**

**College Sanda Selected Students Sensitive Quality Test Index Consultation Questionnaire( 2st round )**

Professor experts Hello !

Thank you very much for your valuable opinions in the first round of consultation questionnaire. According to the revision opinions put forward by experts, the second round of questionnaire will be adjusted. The purpose of the second round of consultation questionnaire is to scientifically and effectively select the sensitive quality test indicators of Sanda students in six colleges and universities. The questions designed in this questionnaire only refer to this paper, and there is no right or wrong. Your comments will be an important basis for my thesis writing, please fill in truthfully.

**formfilling explanation**

1.This expert questionnaire design uses Likert5 rating method, please rate and evaluate the importance of each index in the following tables. According to its importance, we divide it into five levels : very unimportant, less important, generally important, more important, very important, assigned 5, 4, 3, 2, 1 respectively. Please fill in the number in the column “Importance ( 1-5 )” of the appropriate indicator.

2.2.If you have any suggestions ( changes / additions / deletions ) on the indicators listed in the table, please indicate in the “whether to modify”column and specify the proposed changes in the“suggestions for modification” column.

**First part**

1.What is your title ?

A. Professor

B. Associate Professor

C. Lecturer

D. Coach

2.Your work unit ?

3.Your major ( research direction ) ?

**Second part**

| **Test indicators** | **Rating assignment（1-5）** | **whether to modify** | **suggestions for modification** |
| --- | --- | --- | --- |
| Pro agility test |  |  |  |
| Illinois sensitivity test |  |  |  |
| Compass pointer test |  |  |  |
| Cross quadrant jump test |  |  |  |
| Six point test |  |  |  |
| 15s repeated challenge arena jump |  |  |  |
| T-shaped agility test |  |  |  |
| Fist leg combination cohesion test |  |  |  |

**Table2-1 The second round of three-level sensitive quality test index screening**
