# Supplementary material for: Experimental study on the impact of Speed-Agility-Quickness Training method on the agility performance of collegiate sanda specialty students
Source: PeerJ journal article supplement (doi:10.7717/peerj.19406), 2025-05-14
Supplement: raw_data.xlsx [file raw_data.xlsx]

## Sheet: Sheet1
Cross quadrant jump test(s)					Pro agility test(s)					Compass pointer test(s)
Group	Pre-test	Mid-test	Post-test		Group	Pre-test	Mid-test	Post-test		Group	Pre-test	Mid-test	Post-test
Control group	19.27	19.03	17.24		Control group	7.29	7.21	7.08		Control group	8.23	8.12	8.13
Control group	18.46	18.06	17.88		Control group	7.38	7.28	7.14		Control group	8.12	8.03	8
Control group	19.03	18.53	17.22		Control group	7.07	7.01	6.98		Control group	8.25	8.15	8.23
Control group	18.97	18.24	17.48		Control group	7.65	7.12	6.96		Control group	8.56	8.23	8.01
Control group	17.23	17.01	16.87		Control group	7.95	7.59	7.23		Control group	8.58	8.52	8.23
Control group	18.38	17.93	17.52		Control group	7.59	7.49	7.26		Control group	7.87	7.53	7.49
Control group	18.82	18.23	17.92		Control group	7.13	7.11	7.09		Control group	7.85	7.74	7.59
Control group	18.06	17.66	17.32		Control group	7.36	7.13	7.12		Control group	8.23	8.23	8.19
Control group	17.89	17.25	17.02		Control group	7.69	7.36	7.29		Control group	8.18	8.15	8.09
Control group	18.64	17.98	17.93		Control group	7.25	7.15	7.11		Control group	8.19	8.1	8.05
Control group	19.13	18.69	16.55		Control group	7.16	7.11	7.05		Control group	7.65	7.55	7.45
Control group	17.93	17.3	16.41		Control group	6.73	6.59	6.47		Control group	8.23	8.15	8.08
Experimental group	18.46	17.54	15.24		Experimental group	7.52	7.21	6.59		Experimental group	8.19	7.89	6.89
Experimental group	19.59	17.82	17.21		Experimental group	7.38	7.08	6.32		Experimental group	8.32	7.92	6.98
Experimental group	19.33	17.65	16.11		Experimental group	7.11	6.92	5.29		Experimental group	7.61	7.54	6.81
Experimental group	18.42	16.31	15.36		Experimental group	7.29	6.83	6.23		Experimental group	8.58	7.23	6.76
Experimental group	17.21	16.28	16.28		Experimental group	6.93	6.78	5.44		Experimental group	7.98	7.18	6.29
Experimental group	17.36	17.19	16.32		Experimental group	6.96	6.86	5.89		Experimental group	8.63	7.15	6.54
Experimental group	18.28	17.23	16.89		Experimental group	7.85	7.23	5.69		Experimental group	6.83	6.27	6.14
Experimental group	18.52	18.19	16.53		Experimental group	6.95	6.81	6.42		Experimental group	8.15	6.82	6.59
Experimental group	19.49	18.08	15.94		Experimental group	7.13	6.98	5.48		Experimental group	7.69	6.89	6.58
Experimental group	19.38	17.43	15.82		Experimental group	7.58	7.08	5.69		Experimental group	8.39	7.69	6.23
Experimental group	18.56	17.03	16.59		Experimental group	7.29	7.01	6.58		Experimental group	7.38	6.39	6.31
Experimental group	18.01	17.22	15.62		Experimental group	7.18	6.73	6.45		Experimental group	7.22	6.99	5.87
Illinois test run(s)					Fist leg combination cohesion test(pcs)					15s repeated challenge arena jump(pcs)
Group	Pre-test	Mid-test	Post-test		Group	Pre-test	Mid-test	Post-test		Group	Pre-test	Mid-test	Post-test
Control group	23.76	23.02	21.35		Control group	9	10	11		Control group	9	10	11
Control group	22.89	22.54	20.65		Control group	10	11	11		Control group	8	10	10
Control group	23.61	22.92	19.25		Control group	11	12	12		Control group	9	9	10
Control group	20.36	19.54	18.22		Control group	9	11	12		Control group	10	9	11
Control group	22.63	20.2	19.83		Control group	8	10	11		Control group	11	10	10
Control group	21.54	20.98	19.34		Control group	10	12	12		Control group	11	11	11
Control group	23.71	21.89	20.09		Control group	11	12	12		Control group	11	11	11
Control group	22.81	21.54	20.18		Control group	12	12	12		Control group	10	11	11
Control group	21.62	20.75	21.84		Control group	11	11	11		Control group	10	11	10
Control group	23.14	22.73	20.16		Control group	11	12	13		Control group	9	10	11
Control group	22.37	21.83	20.56		Control group	12	13	13		Control group	11	12	12
Control group	21.12	20.15	19.43		Control group	12	12	12		Control group	11	11	11
Experimental group	23.65	20.72	18.76		Experimental group	9	12	14		Experimental group	8	11	14
Experimental group	22.87	19.43	17.24		Experimental group	11	13	15		Experimental group	9	10	13
Experimental group	22.63	19.87	17.52		Experimental group	11	13	15		Experimental group	9	11	13
Experimental group	23.72	18.65	17.83		Experimental group	10	12	14		Experimental group	9	12	14
Experimental group	23.01	21.18	16.25		Experimental group	9	12	14		Experimental group	10	12	13
Experimental group	20.18	19.45	19.36		Experimental group	9	11	16		Experimental group	11	11	12
Experimental group	20.87	18.56	16.87		Experimental group	10	11	14		Experimental group	10	11	14
Experimental group	21.23	17.28	17.12		Experimental group	11	13	15		Experimental group	11	12	13
Experimental group	22.32	17.64	16.23		Experimental group	12	13	15		Experimental group	11	11	15
Experimental group	21.87	18.58	18.38		Experimental group	10	11	13		Experimental group	10	10	13
Experimental group	22.45	19.43	18.67		Experimental group	10	12	16		Experimental group	9	10	16
Experimental group	22.69	19.62	16.82		Experimental group	12	13	16		Experimental group	10	12	13
